# Supplementary material for: Link between a highkonfor drug binding and a fast clinical action: to be or not to be?
Source: Royal Society of Chemistry journal article supplement (doi:10.1039/c8md00296g), 2018-01-01

## Dosing paradigm

Constant  $[L_{\max}]/K_D$

Article  
Fig. 2B:

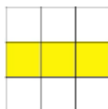

Constant  $[L_{\max}]$  &  $K_D$

Article  
Fig. 2B  
& 2C:

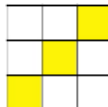

Constant  $[L_{\max}]$

Article  
Fig. 2C:

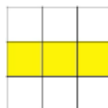

$k_1$  (  $M^{-1}min^{-1}$  )

$1.10^6$  (Fr = 1)

$1.10^7$  (Fr = 10)

$1.10^8$  (Fr = 100)

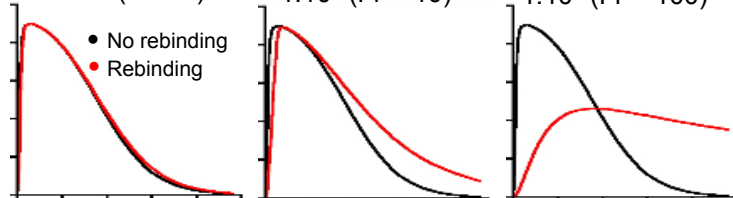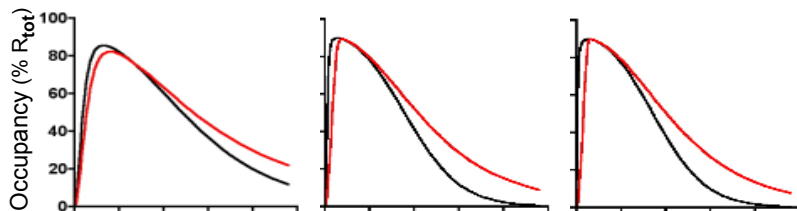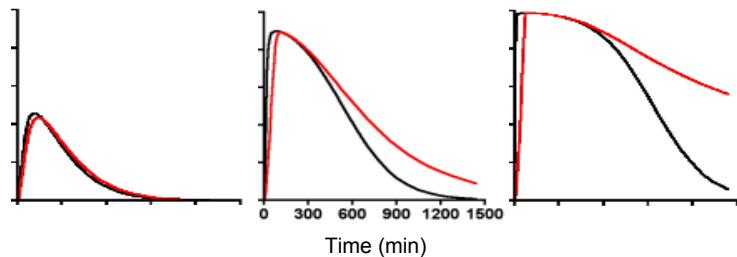

Supplement: c8md00296g1.pdf [file c8md00296g1.pdf]
