# Supplementary material for: Link between a highkonfor drug binding and a fast clinical action: to be or not to be?
Source: Royal Society of Chemistry journal article supplement (doi:10.1039/c8md00296g), 2018-01-01

**A)** Single-step PK-PD model with target turnover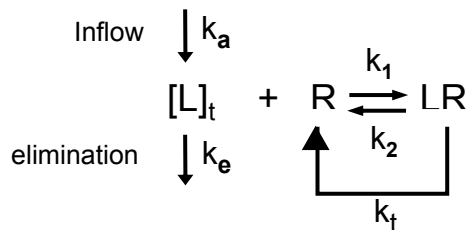**B)** *In vivo* occupancy profilesDissociation  $t_{1/2}$  (min)

3

30

300

No rebinding

Turnover  
 $t_{1/2}$  (min)

— no  
— 10  
— 30  
— 100  
— 300  
— 1000

Rebinding  
(Fr = 10)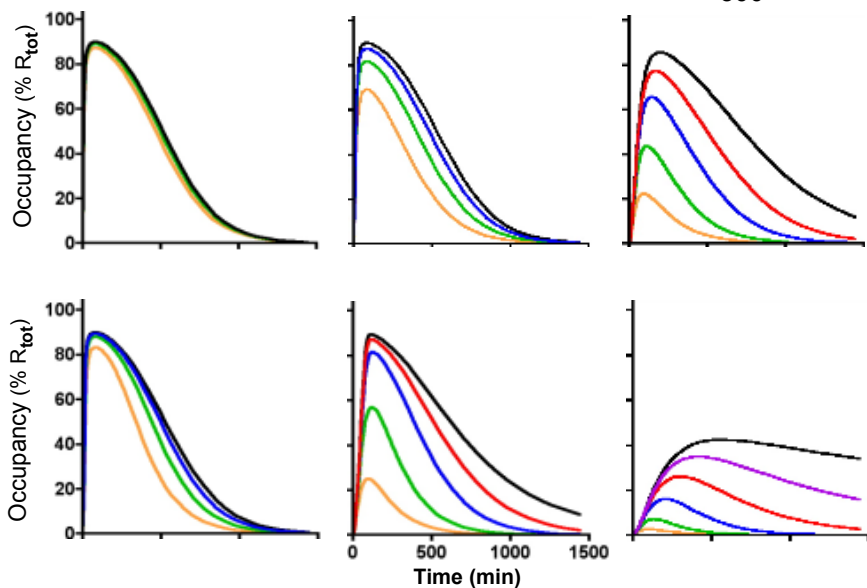

Supplement: c8md00296g2.pdf [file c8md00296g2.pdf]
